# Supplementary material
Source: PubMed Central journal article supplement (PMC5883100)
Supplement: ajcr0008-0514-f6.pdf [file ajcr0008-0514-f6.pdf]

## YY1 and HDAC9c transcriptionally regulate p38 in cell differentiation

**Table S1.** Primer Sequences for q-PCR

| Primers              | Sequences                                                           |
|----------------------|---------------------------------------------------------------------|
| Human p38            | Fwd 5'-GAACCAGTGGCCGATCCTTA-3'<br>Rev 5'-GTGGTGGCACAAAGCTGATG-3'    |
| Human HDAC9c         | Fwd 5'-GCAACAGGTAATAGGCAAAG-3'<br>Rev 5'-CACTGAACTCAAATCATAGAG-3'   |
| Human $\beta$ -actin | Fwd 5'-CTGGAACGGTGAAGGTGACA-3'<br>Rev 5'-AAGGGACTTCCTGTAACAATGCA-3' |
| p38-q-ChIP           | Fwd 5'-AGAGACGAGGTTTCACCATG-3'<br>Rev 5'-CTGCTCAAGGACATATGGGT-3'    |

Fwd: forward; Rev: reverse.
